# Supplementary material for: Efficient metal-free crosslinking of common propellant binders using nitrile oxide–alkene click ligation
Source: Royal Society of Chemistry journal article supplement (doi:10.1039/d3py01081c), 2023-01-01
Supplement: d3py01081c1.pdf [file d3py01081c1.pdf]

## Electronic Supplementary Information

### Efficient metal-free crosslinking for common propellant binders using nitrile oxide-alkene click ligation

Jinkang Dou,<sup>a</sup> Lijie Cheng,<sup>b</sup> Bojun Tan,<sup>a</sup> Binghui Duan,<sup>a</sup> Minghui Xu,<sup>a</sup> Bozhou Wang<sup>a</sup>  
and Ning Liu<sup>a,\*</sup>

<sup>a</sup> Department of Energetic Materials Science and Technology, Xi'an Modern Chemistry Research Institute, Xi'an 710065, China.

<sup>b</sup> School of Energy and Power Engineering, Xi'an Jiaotong University, Xi'an 710049, China.

\* Corresponding authors.

† Email: flackliu@sina.com

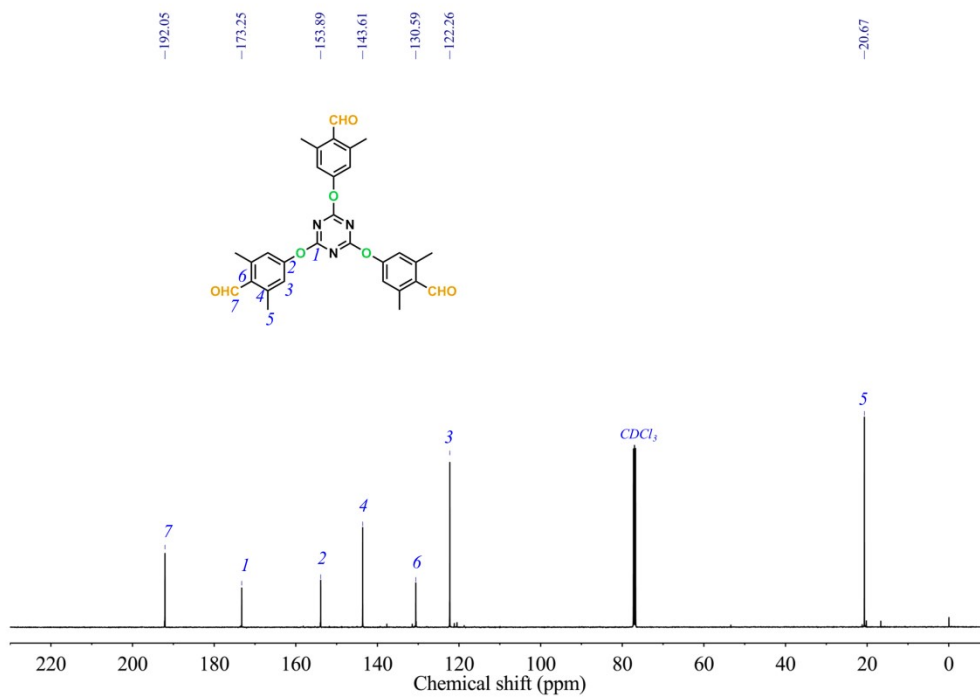

Figure S1.  $^{13}C$ -NMR spectrum of trialdehyde in  $CDCl_3$ .

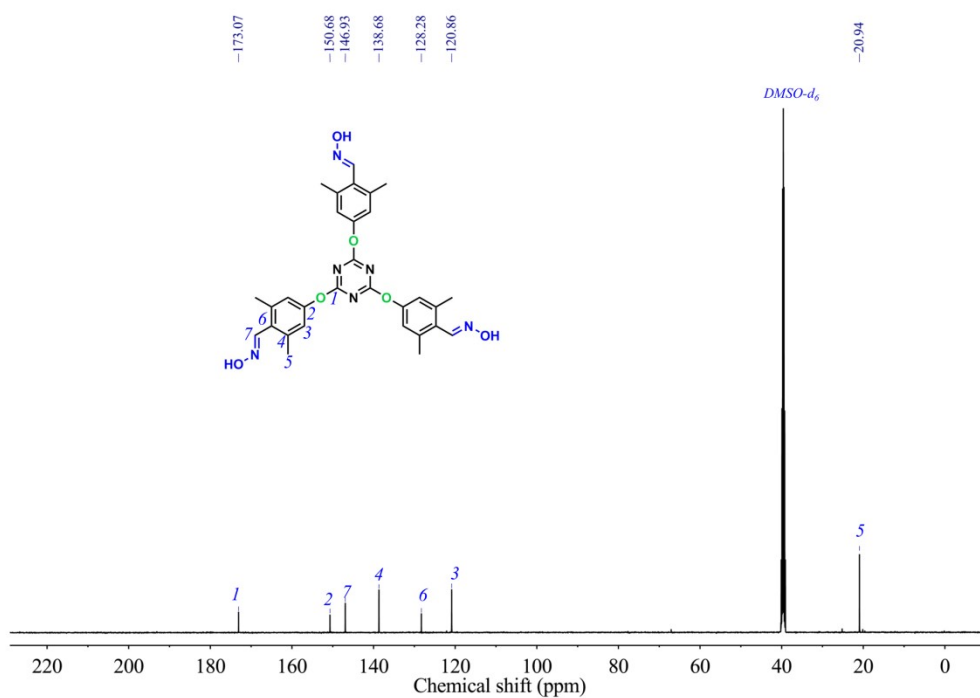

Figure S2.  $^{13}C$ -NMR spectrum of trioxime in  $DMSO-d_6$ .

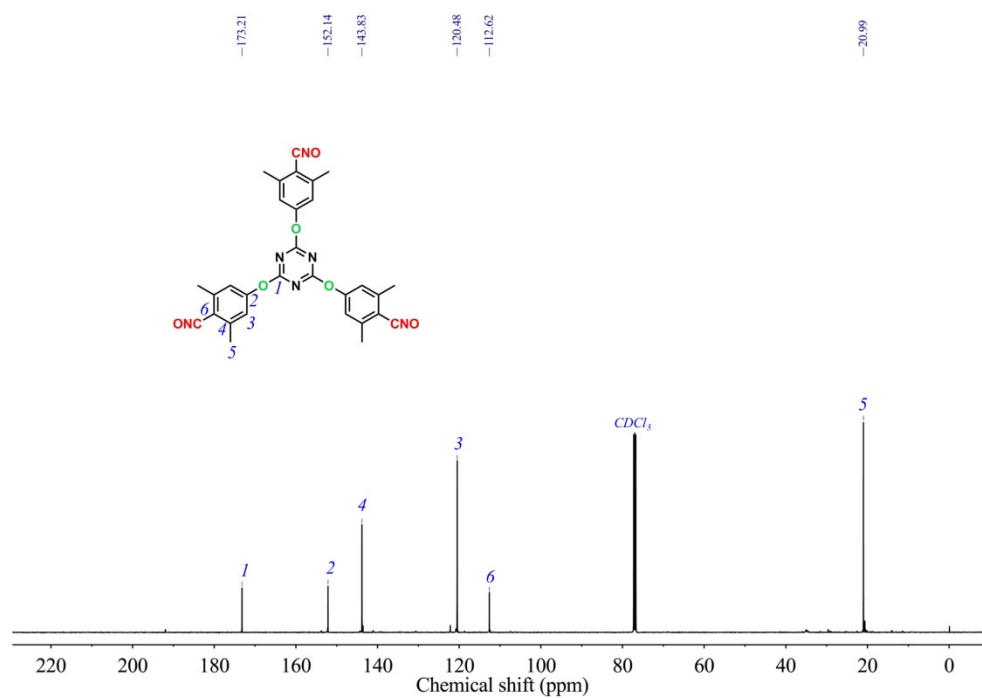

Figure S3. <sup>13</sup>C-NMR spectrum of TNO in CDCl<sub>3</sub>.

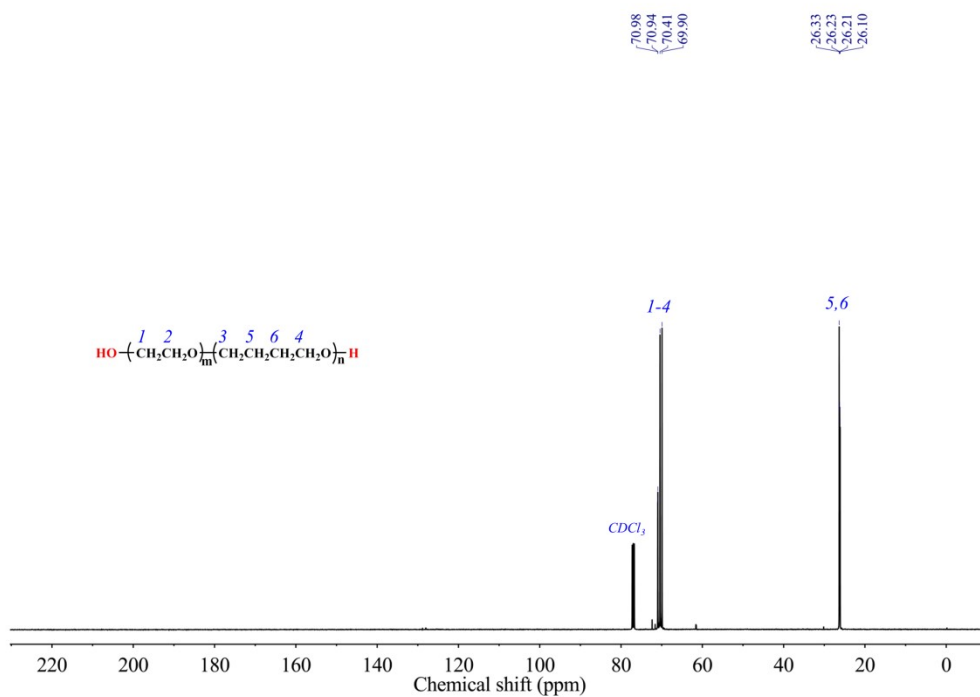

Figure S4. <sup>13</sup>C-NMR spectrum of HTP in CDCl<sub>3</sub>.

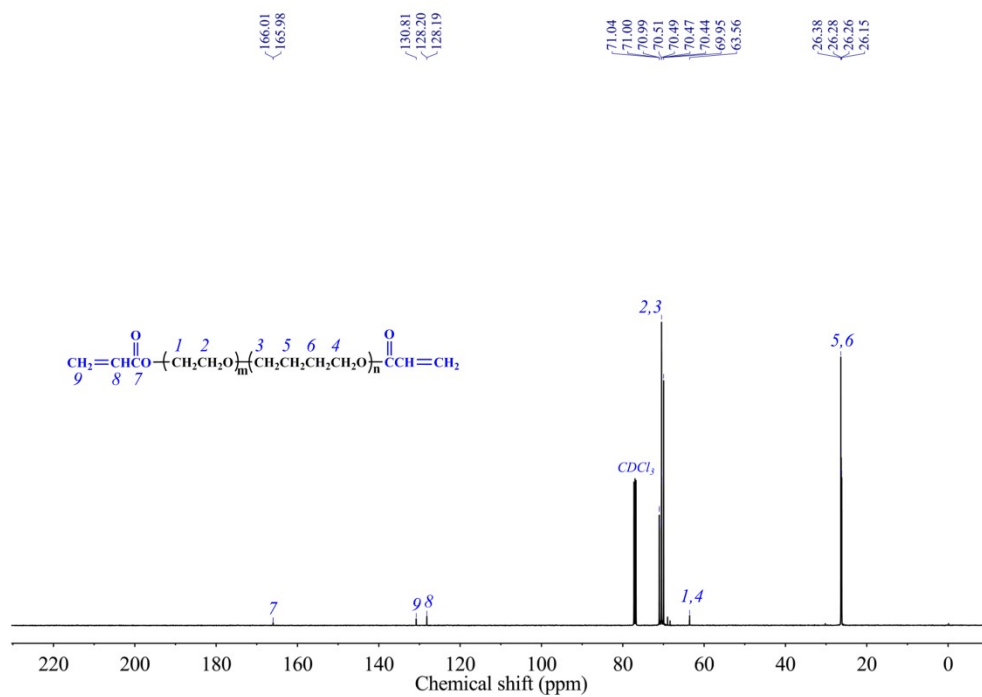

Figure S5.  $^{13}\text{C}$ -NMR spectrum of ATPET-1 in  $\text{CDCl}_3$ .

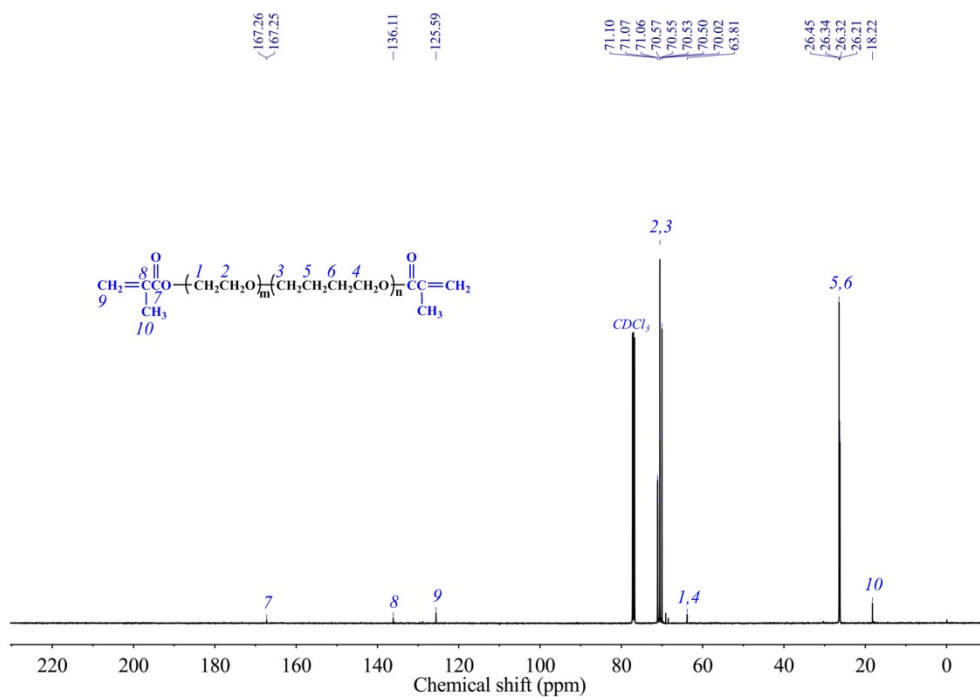

Figure S6.  $^{13}\text{C}$ -NMR spectrum of ATPET-2 in  $\text{CDCl}_3$ .

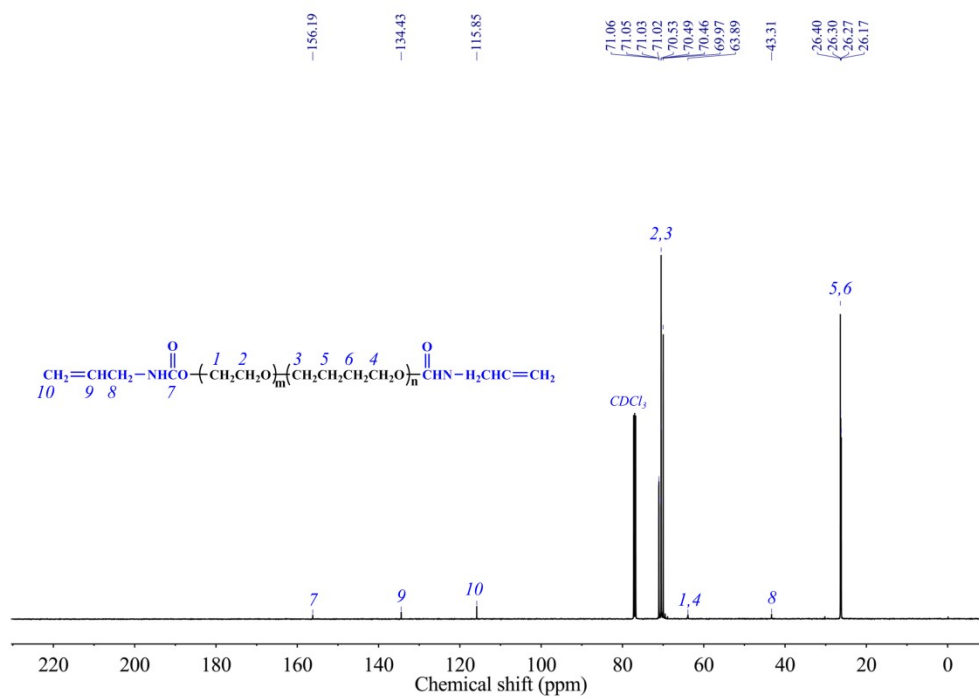

**Figure S7.**  $^{13}\text{C}$ -NMR spectrum of ATPET-3 in  $\text{CDCl}_3$ .

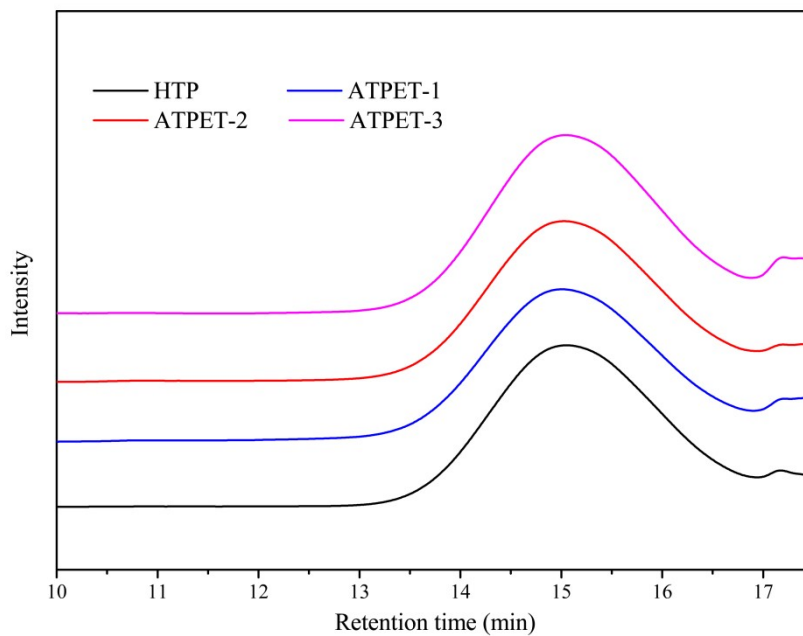

**Figure S8.** GPC curves of HTP (black line), ATPET-1 (blue line), ATPET-2 (red line) and ATPET-3 (magenta line).

**Table S1.**  $M_n$  and PDI of HTP, ATPET-1, ATPET-2 and ATPET-3.

| Binder                       | HTP  | ATPET-1 | ATPET-2 | ATPET-3 |
|------------------------------|------|---------|---------|---------|
| $M_n$ (g·mol <sup>-1</sup> ) | 4894 | 5042    | 5557    | 4994    |
| PDI                          | 1.47 | 1.48    | 1.33    | 1.43    |

**Table S2.** Viscosity and  $T_g$  of HTP, ATPET-1, ATPET-2 and ATPET-3.

| Binder                 | HTP    | ATPET-1 | ATPET-2 | ATPET-3 |
|------------------------|--------|---------|---------|---------|
| Viscosity (Pa·s, 25°C) | 16.09  | 16.98   | 16.15   | 17.22   |
| $T_g$ (°C)             | -80.38 | -79.79  | -79.97  | -79.78  |

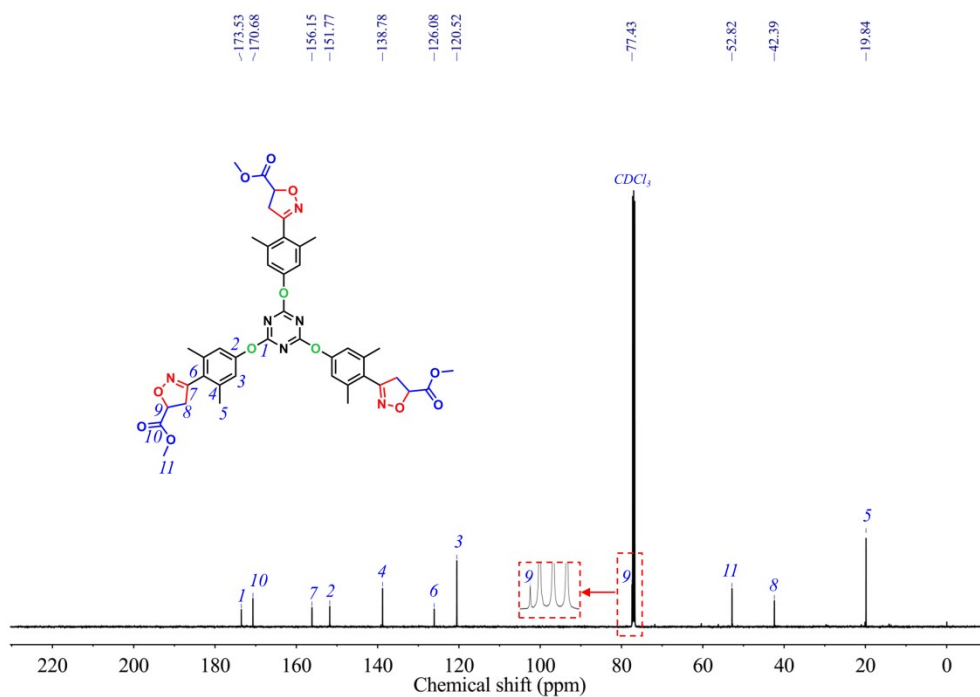**Figure S9.** <sup>13</sup>C-NMR spectrum of isoxazoline products in CDCl<sub>3</sub> formed from TNO and methyl acrylate.

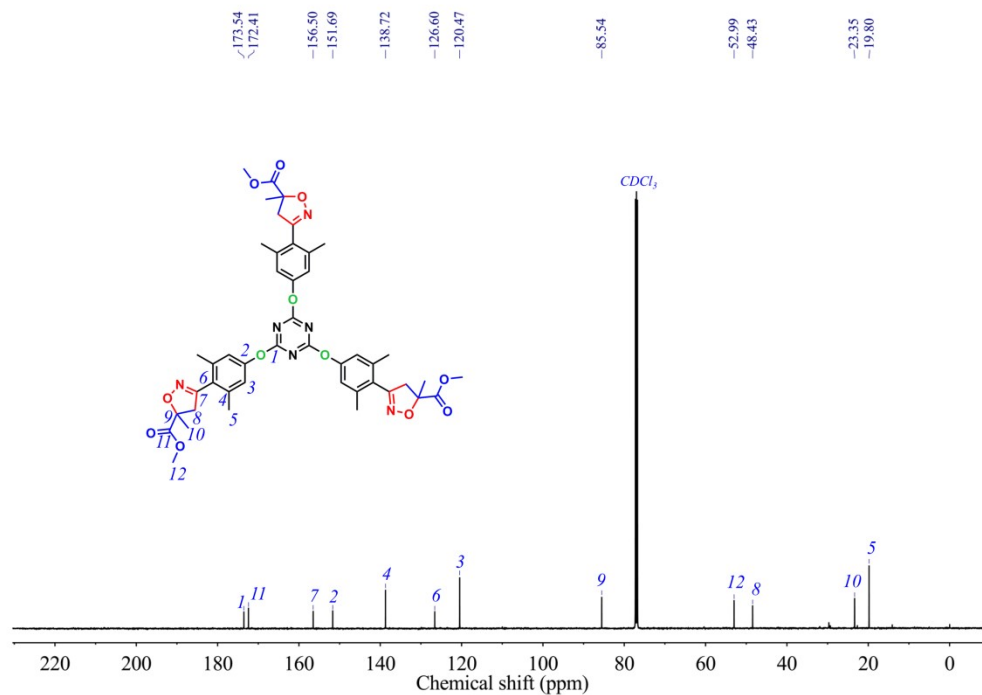

**Figure S10.**  $^{13}C$ -NMR spectrum of isoxazoline products in  $CDCl_3$  formed from TNO and methyl methacrylate.

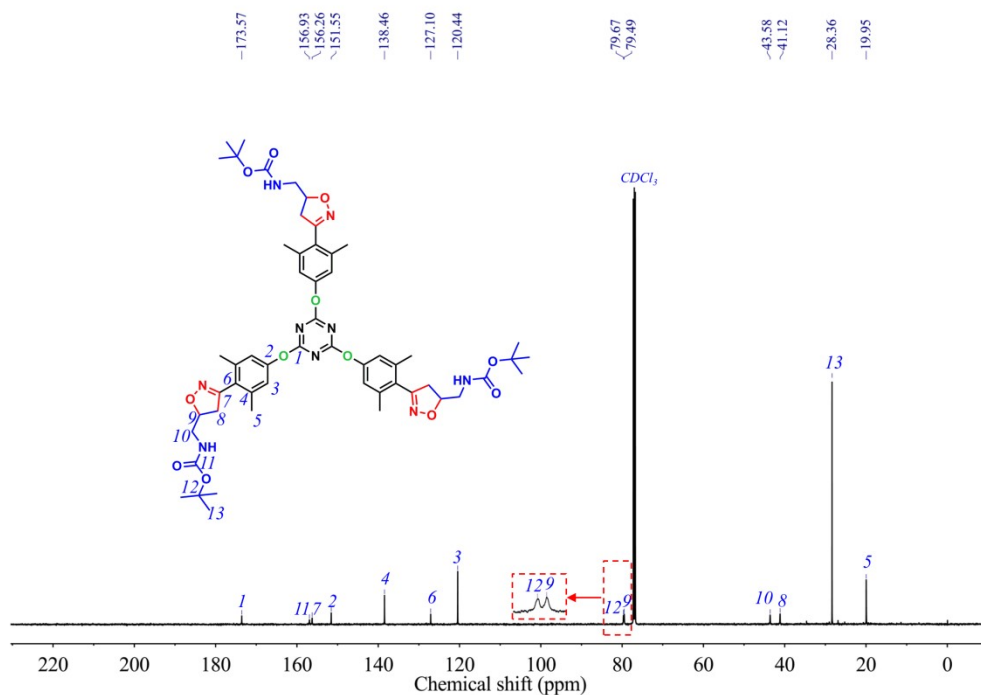

**Figure S11.**  $^{13}C$ -NMR spectrum of isoxazoline products in  $CDCl_3$  formed from TNO and *tert*-butyl allylcarbamate.

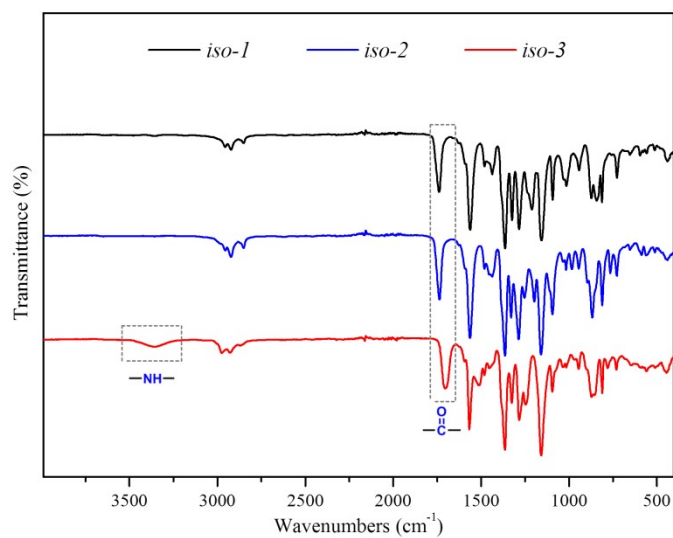

**Figure S12.** FTIR spectra of isoxazoline products formed from TNO with methyl acrylate (black line), methyl methacrylate (blue line) and *tert*-butyl allylcarbamate (red line), respectively.

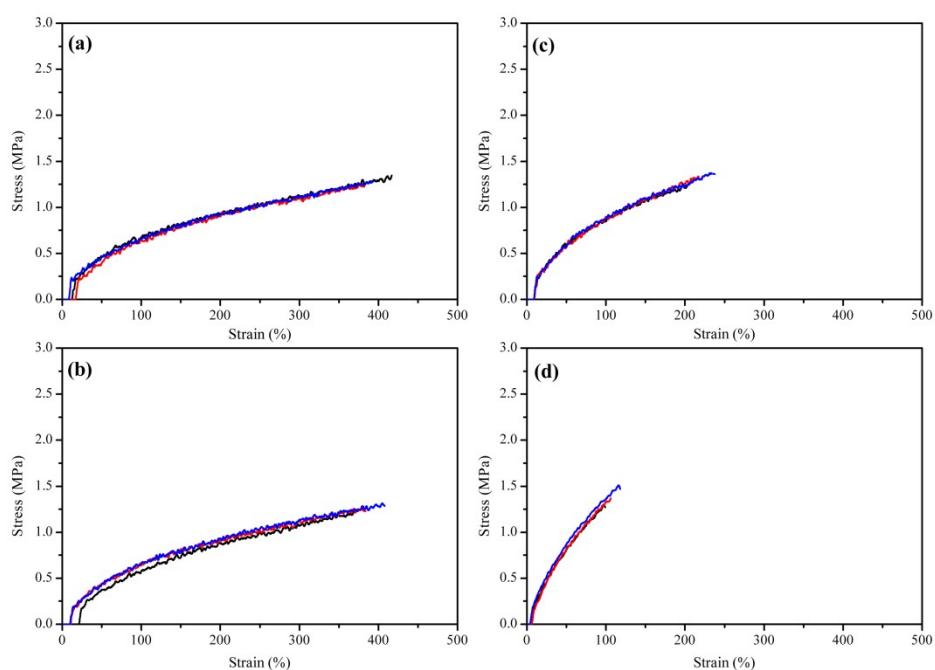

**Figure S13.** Stress-strain curves of elastomers formed from (a) ATPET-1/TNO, (b) ATPET-2/TNO, (c) ATPET-3/TNO and (d) HTP/N100.



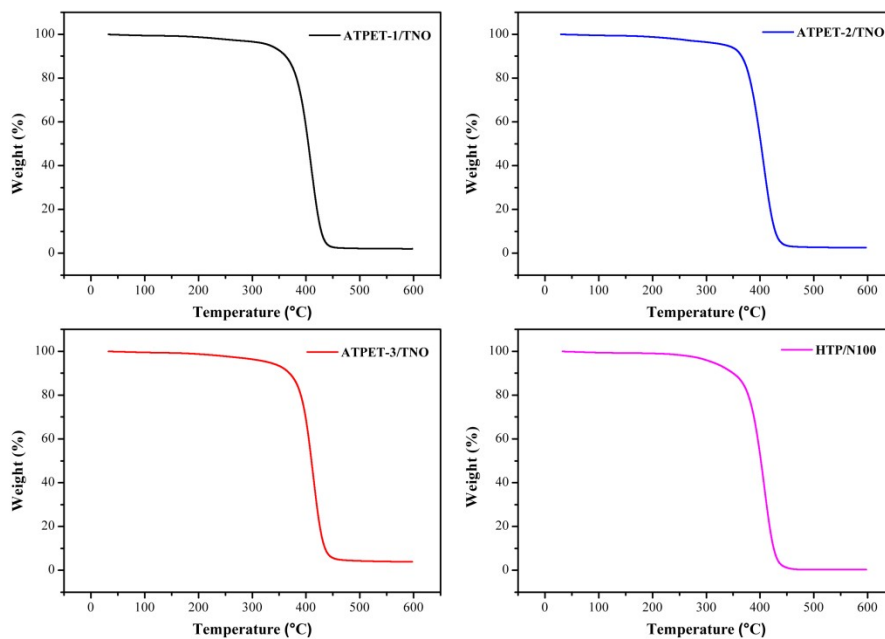

**Figure S14.** TG curves of elastomers formed from ATPET-1/TNO (black line), ATPET-2/TNO (blue line), ATPET-3/TNO (red line) and HTP/N100 (magenta line).

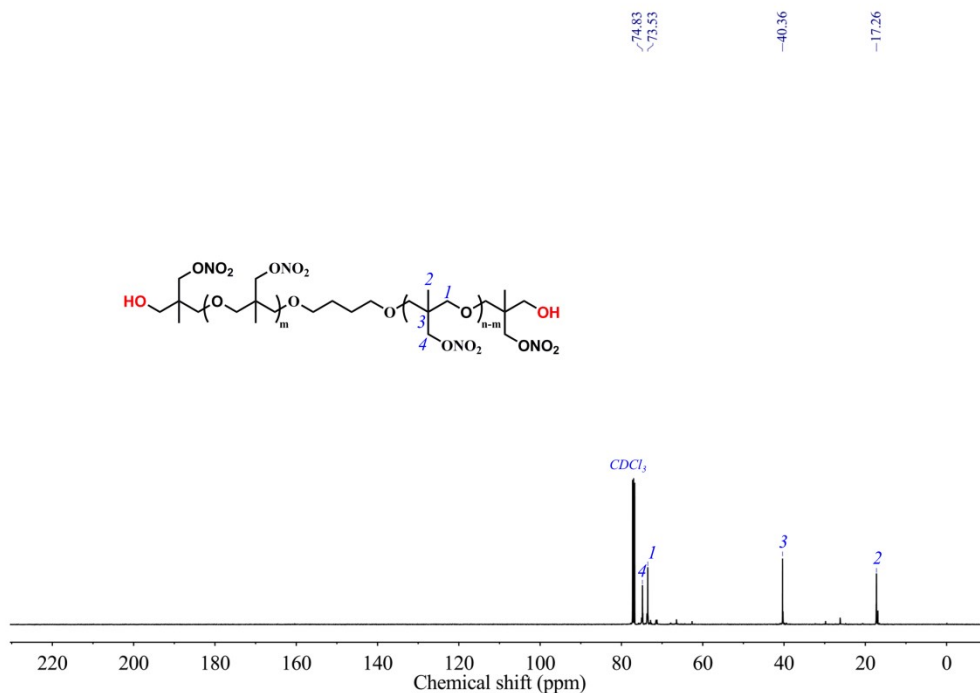

**Figure S15.**  $^{13}\text{C}$ -NMR spectrum of PNIMMO in  $\text{CDCl}_3$ .

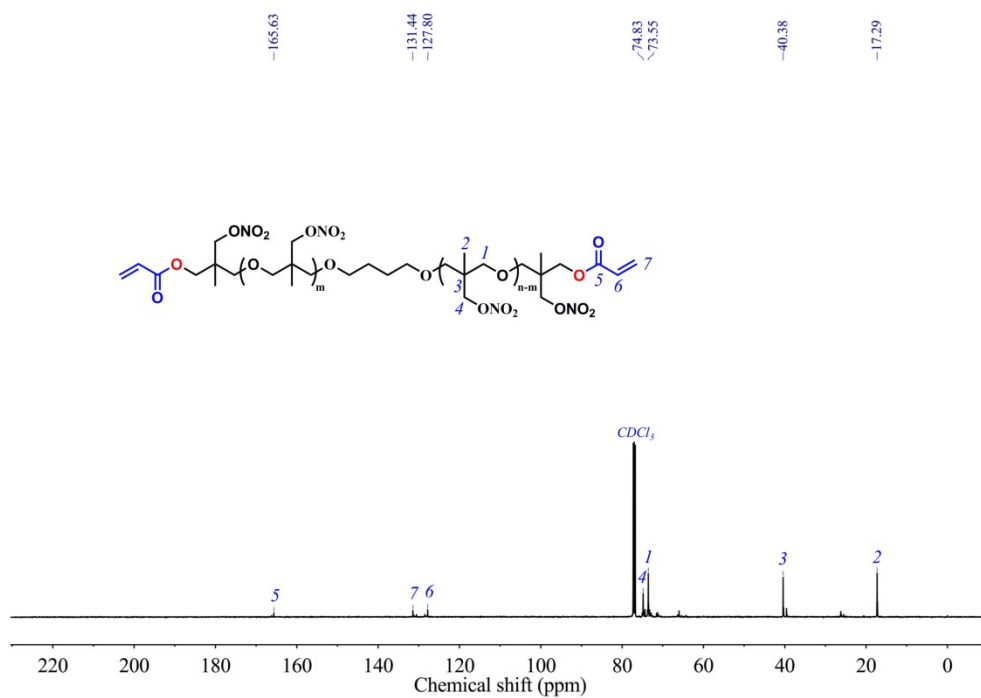

**Figure S16.** <sup>13</sup>C-NMR spectrum of ATPNIMMO in CDCl<sub>3</sub>.

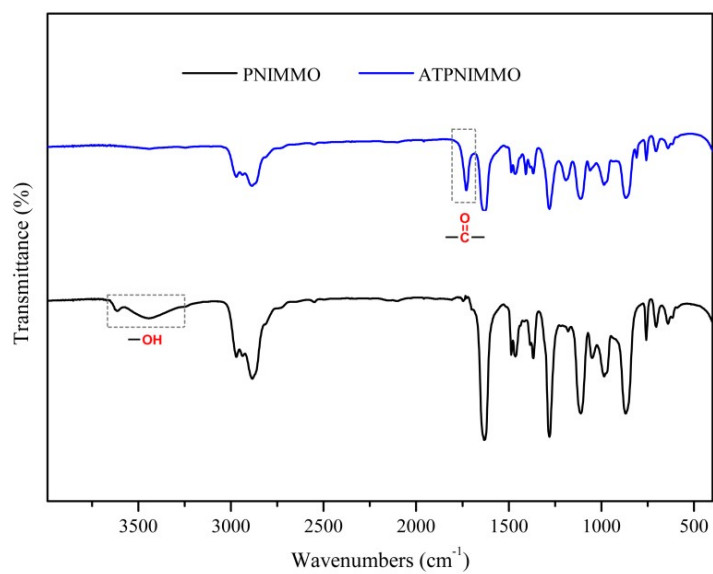

**Figure S17.** FTIR spectra of PNIMMO (black line) and ATPNIMMO (blue line).

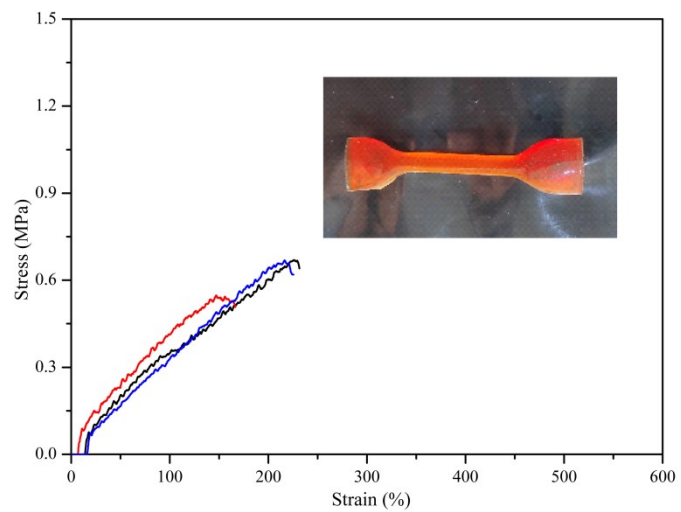

**Figure S18.** Stress-strain curves and photo of elastomers formed from ATPNIMMO/TNO.
